# Supplementary material
Source: Springer Nature journal article supplement (https://www.springermedizin.de/resource/supplementary/13023_2014_750_MOESM5_ESM.pdf/9642974)
Supplement: MOESM5 [file 9642974]

## Velasco et al., Additional File 5

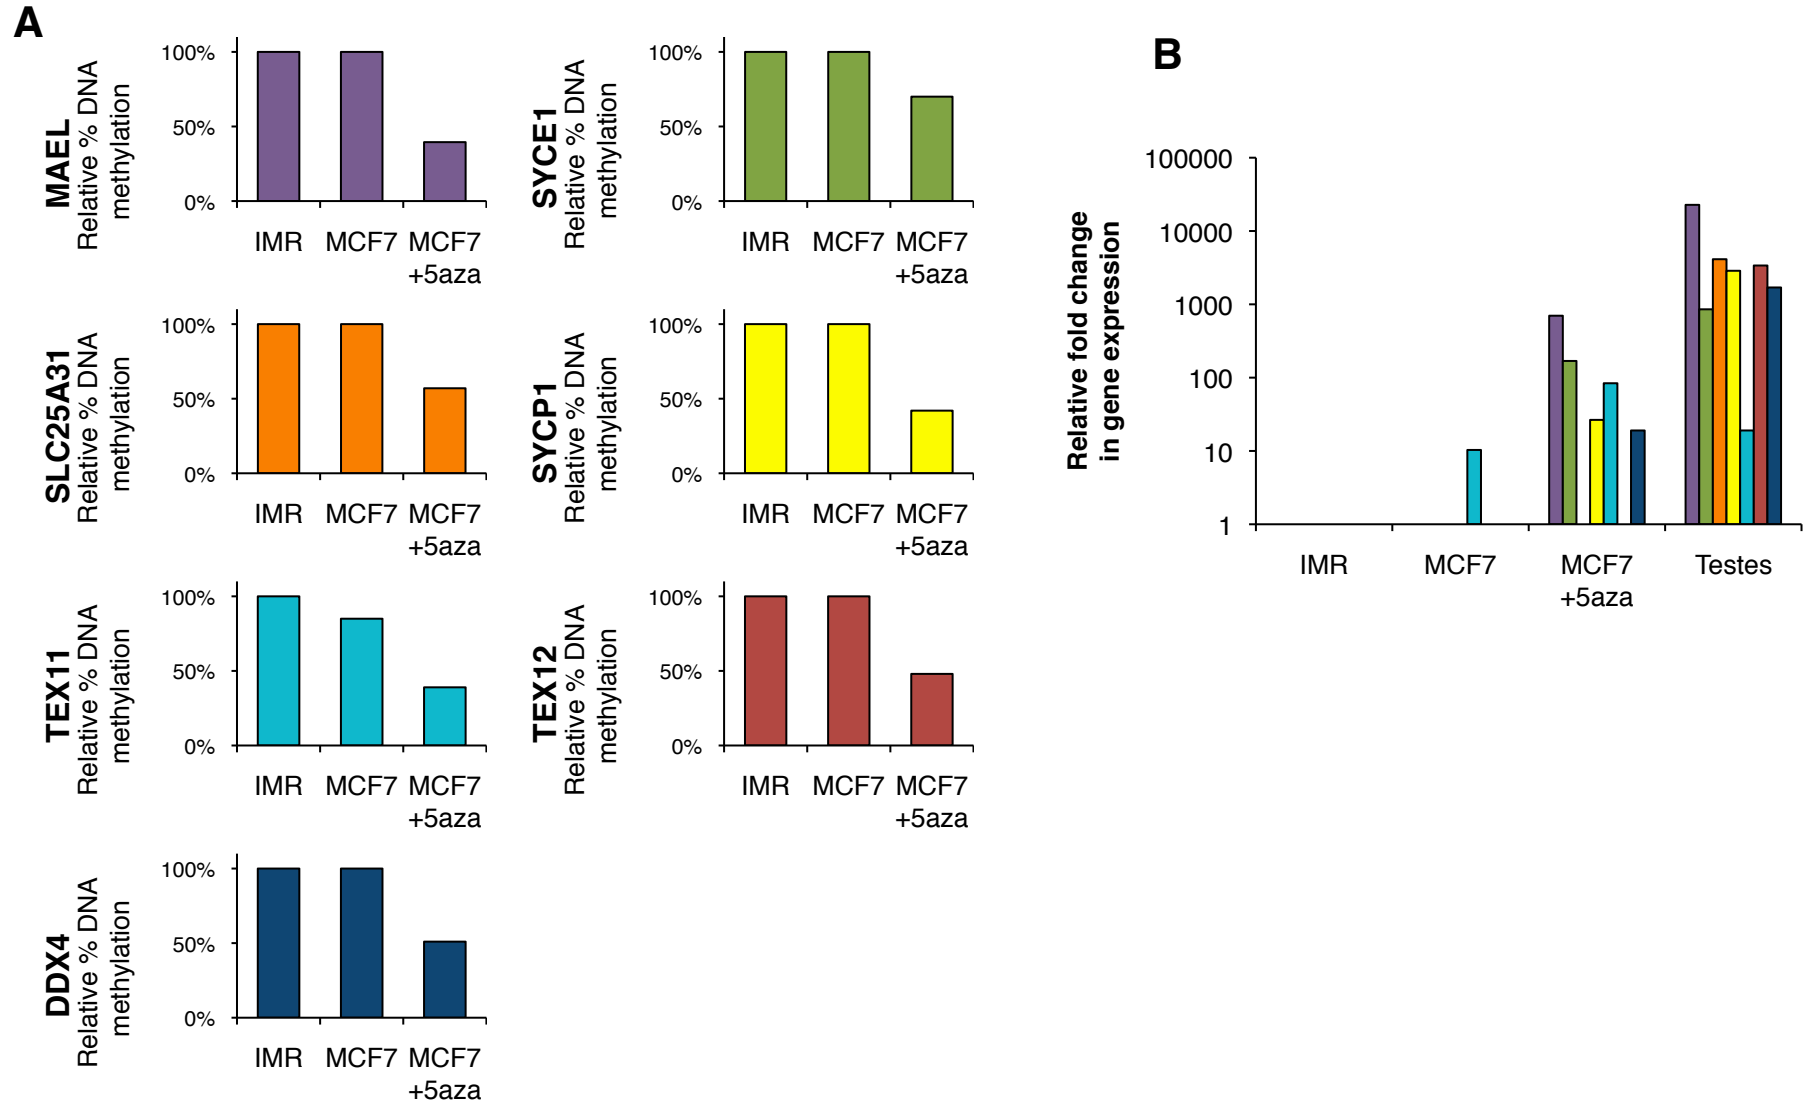

**Additional File 5. Analysis of promoter methylation and expression of germline genes in control conditions.** (A) DNA methylation was assessed as in Figure 2. (B) Expression of germline genes was assessed by qRT-PCR as in Figure 1, normalized to U6 snRNA levels and presented as fold change relative to the primary human fibroblast line IMR-90. The breast cancer cell line MCF7 treated by the demethylating agent 5-azacytidine (5aza) and human testes were used as positive controls for DNA methylation and expression assays. Data are expressed as relative changes compared to a negative control, IMR-90 fibroblasts (IMR), where germline genes are repressed by DNA methylation.
